# Supplementary material for: On the design of Ag–morin nanocomposite to modify calcium alginate gel: framing out a novel sodium ion trap
Source: Royal Society of Chemistry journal article supplement (doi:10.1039/c5ra10938h), 2015-01-01
Supplement: c5ra10938h1.pdf [file c5ra10938h1.pdf]

## On the Design of Ag-Morin Nanocomposite to Modify Calcium Alginate Gel: Framing Out a Novel Sodium Ion Trap

Kangkana Sarkar and Kamalika Sen\*

Department of Chemistry, University of Calcutta, 92 APC Road, Kolkata 700009, India

(email: kamalchem.roy@gmail.com)

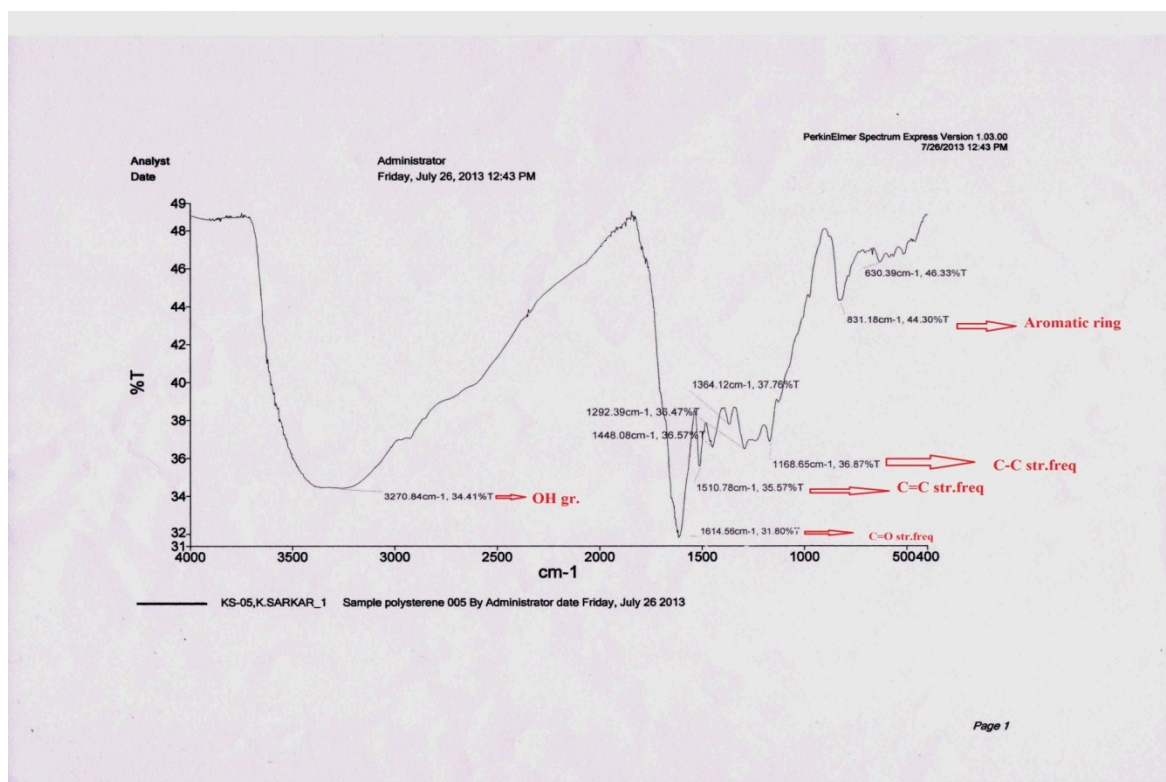

Figure S1: Infra red spectrum of pure morin

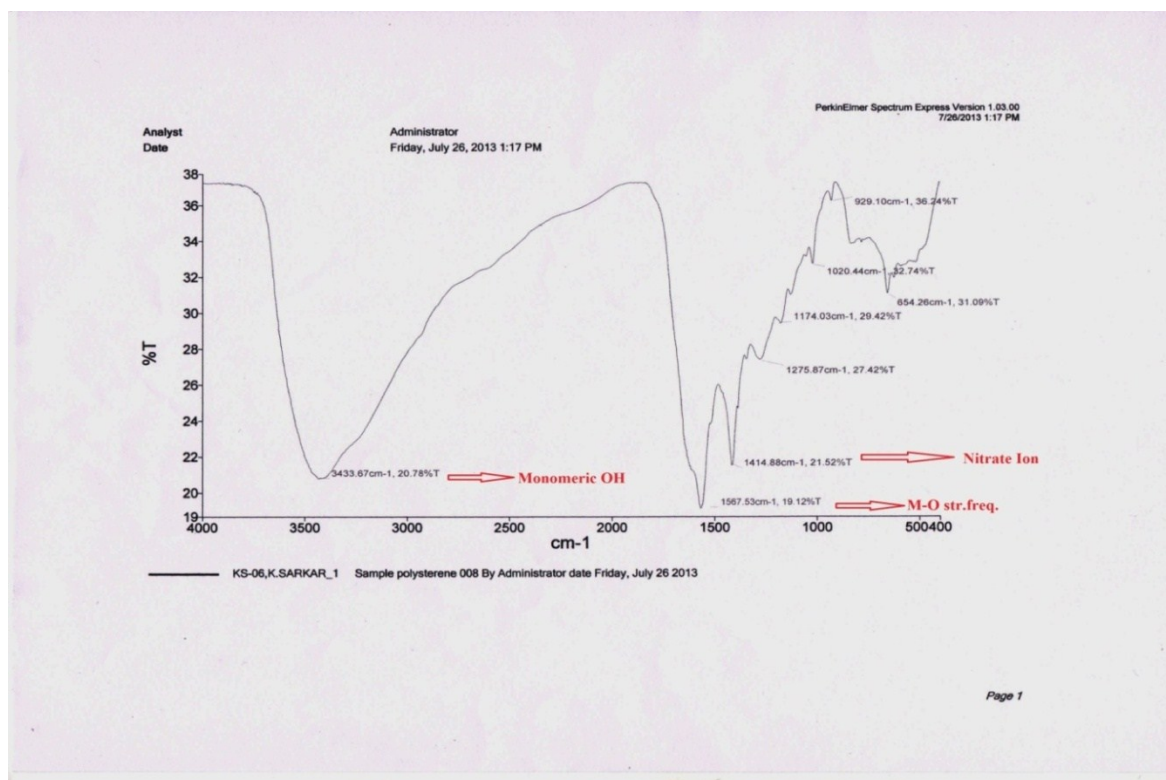

Figure S2: Infra red spectrum of Ag-Morin complex
